# Supplementary material for: Selenium against lead-induced apoptosis in chicken nervous tissues via mitochondrial pathway
Source: PubMed Central journal article supplement (PMC5746131; doi:10.18632/oncotarget.22553), 2017-11-20
Supplement: oncotarget-08-108130-s001.pdf [file oncotarget-08-108130-s001.pdf]

## **Selenium against lead-induced apoptosis in chicken nervous tissues via mitochondrial pathway**

### **SUPPLEMENTARY MATERIALS**

**Supplementary Table 1: The relative mRNA expression of twenty-five selenoproteins in the chicken brain tissues.**

**See Supplementary File 1**

**Supplementary Table 2: The relative mRNA expression of twenty-five selenoproteins in the chicken embryonic neurocytes.**

**See Supplementary File 2**
